# Supplementary material for: A protocol for the definition of supply chains in product social life cycle assessment: application to bioelectricity
Source: Royal Society of Chemistry journal article supplement (doi:10.1039/d0se00919a), 2020-01-01
Supplement: d0se00919a1.pdf [file d0se00919a1.pdf]

## A protocol for the definition of supply chains in product social life cycle assessment: application to bioelectricity

Mario Martín-Gamboa,<sup>\*a,§</sup> Ana Cláudia Dias,<sup>a</sup> Luis Arroja<sup>a</sup> and Diego Iribarren<sup>b</sup>

<sup>a</sup> Centre for Environmental and Marine Studies (CESAM), Department of Environment and Planning, University of Aveiro, Campus Universitário de Santiago, 3810-193 Aveiro, Portugal. E-mail: mario.mgamboa@urjc.es

<sup>b</sup> Systems Analysis Unit, IMDEA Energy. 28935 Móstoles, Spain

<sup>§</sup> Current address: Chemical and Environmental Engineering Group, Rey Juan Carlos University. 28933 Móstoles, Spain

### Supplementary material

#### Social life cycle inventory (S-LCI) results of the bioelectricity system

Figures S1-S12 show the S-LCI results of the additional plants resulting from the application of the protocol.

| Refractory fireclay production, 1 kg (UA) |                         |      | Steel, low-alloyed, hot rolled, production, 1 kg (DE) |                         |                  |
|-------------------------------------------|-------------------------|------|-------------------------------------------------------|-------------------------|------------------|
| Working hours                             | $9.44 \cdot 10^{-3}$ h  | (UA) | Working hours                                         | $7.42 \cdot 10^{-3}$ h  | (DE)             |
| Clay                                      | 1.20 kg                 | (DE) | Ferrochromium                                         | $3.29 \cdot 10^{-2}$ kg | (ZA)             |
| Natural gas                               | $7.69 \cdot 10^{-2}$ \$ | (RU) | Pig iron                                              | 0.9 kg                  | (61% BR, 39% RU) |
| Electricity                               | $1.67 \cdot 10^{-2}$ \$ | (UA) | Natural gas                                           | $1.47 \cdot 10^{-2}$ \$ | (NO)             |
|                                           |                         |      | Electricity                                           | $2.77 \cdot 10^{-2}$ \$ | (DE)             |

  

| Concrete production, 1 kg (PT) |                         |      | Steel, low-alloyed, hot rolled, production, 1 kg (FR) |                         |                  |
|--------------------------------|-------------------------|------|-------------------------------------------------------|-------------------------|------------------|
| Working hours                  | $1.17 \cdot 10^{-3}$ h  | (PT) | Working hours                                         | $7.91 \cdot 10^{-3}$ h  | (FR)             |
| Cement                         | $8.30 \cdot 10^{-2}$ kg | (PT) | Ferrochromium                                         | $3.29 \cdot 10^{-2}$ kg | (58% ZA, 42% KZ) |
| Gravel                         | $2.10 \cdot 10^{-2}$ \$ | (PT) | Pig iron                                              | 0.9 kg                  | (86% RU, 14% BR) |
| Sand                           | $6 \cdot 10^{-3}$ \$    | (PT) | Natural gas                                           | $4 \cdot 10^{-4}$ \$    | (NO)             |
| Natural gas                    | $9.21 \cdot 10^{-6}$ \$ | (DZ) | Electricity                                           | $2.20 \cdot 10^{-2}$ \$ | (FR)             |
| Electricity                    | $2.91 \cdot 10^{-4}$ \$ | (PT) |                                                       |                         |                  |

Fig. S1. S-LCI results of the main blocks regarding boiler production.

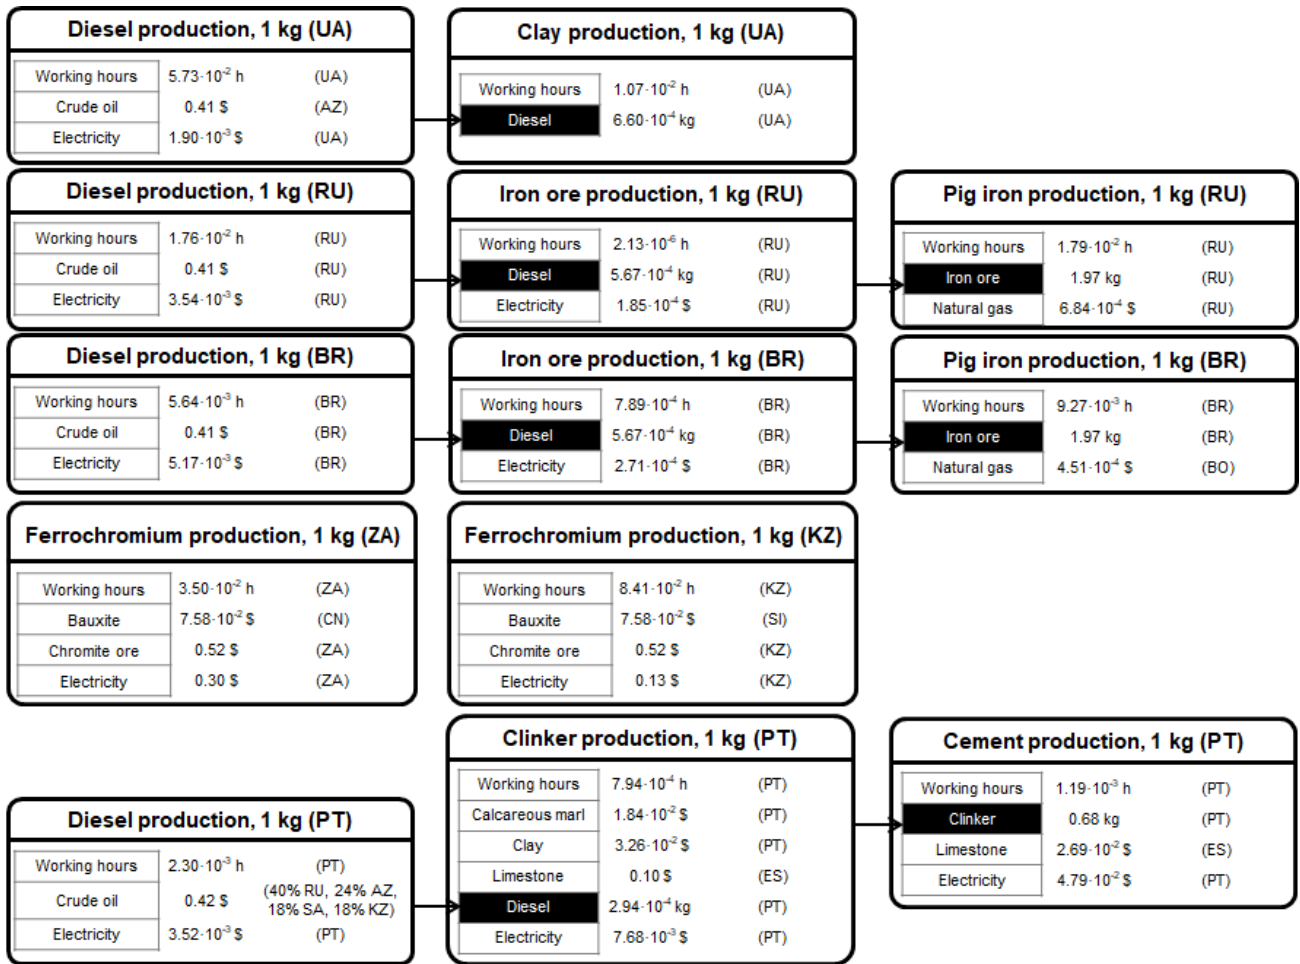

Fig. S2. S-LCI results of the background blocks regarding boiler production.

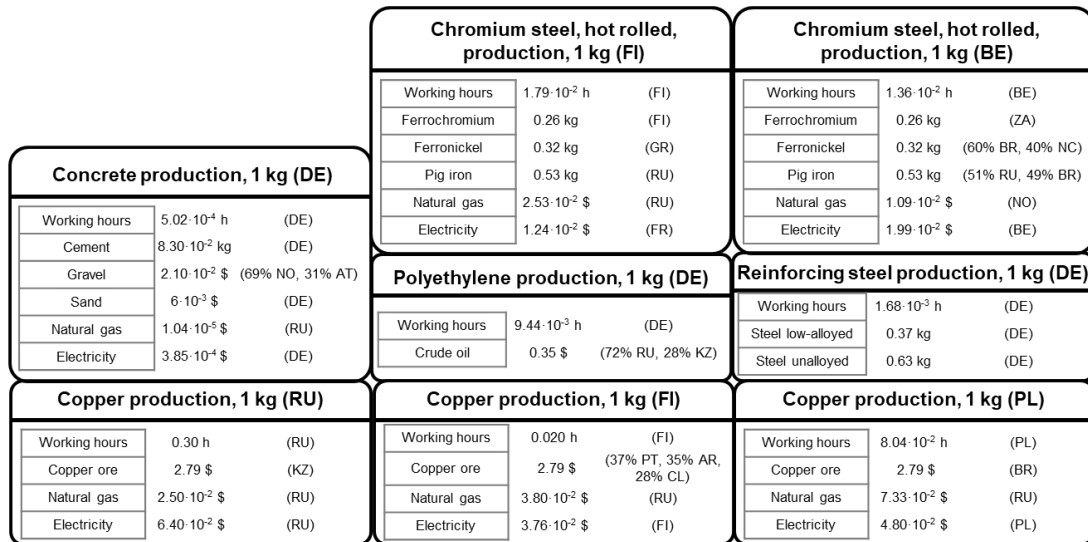

Fig. S3. S-LCI results of the main blocks regarding turbine production.

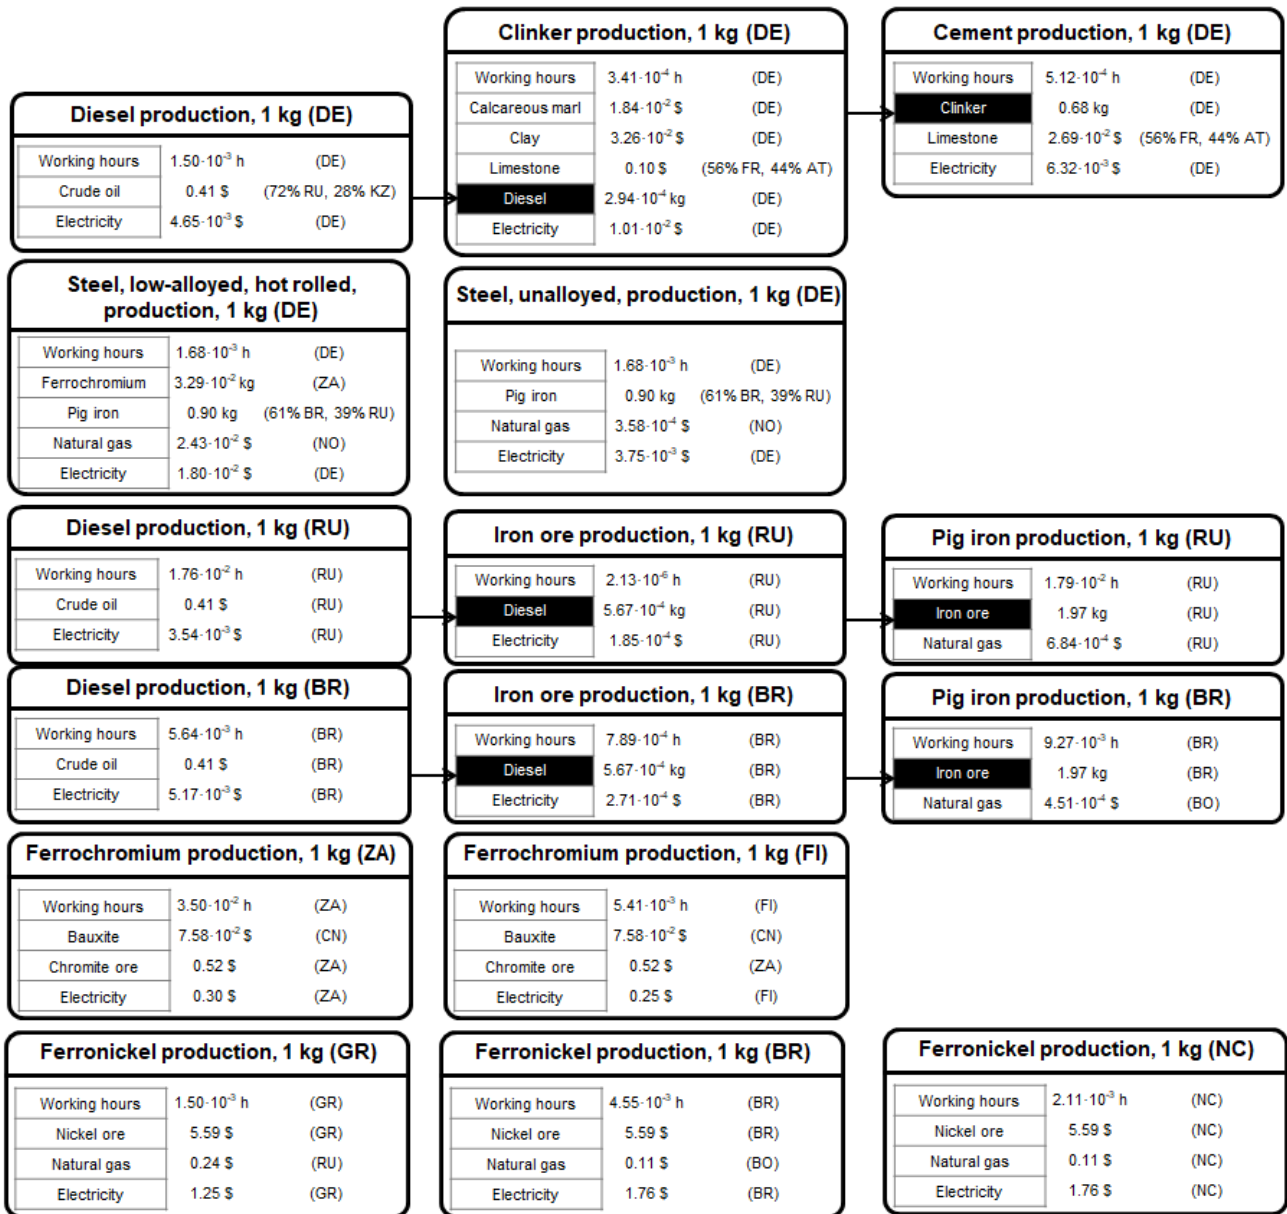

Fig. S4. S-LCI results of the background blocks regarding turbine production.

| Cast iron production, 1 kg (AT)         |                            |                          | Chromium steel, hot rolled, production, 1 kg (FI) |                            |                  | Chromium steel, hot rolled, production, 1 kg (BE) |                            |                  |
|-----------------------------------------|----------------------------|--------------------------|---------------------------------------------------|----------------------------|------------------|---------------------------------------------------|----------------------------|------------------|
| Working hours                           | 5.96 · 10 <sup>-3</sup> h  | (AT)                     | Working hours                                     | 1.79 · 10 <sup>-2</sup> h  | (FI)             | Working hours                                     | 1.36 · 10 <sup>-2</sup> h  | (BE)             |
| Pig iron                                | 0.72 kg                    | (61% RU, 39% UA)         | Ferchromium                                       | 0.26 kg                    | (FI)             | Ferchromium                                       | 0.26 kg                    | (ZA)             |
| Natural gas                             | 1.00 · 10 <sup>-2</sup> \$ | (RU)                     | Ferronickel                                       | 0.32 kg                    | (GR)             | Ferronickel                                       | 0.32 kg                    | (60% BR, 40% NC) |
| Electricity                             | 4.76 · 10 <sup>-2</sup> \$ | (AT)                     | Pig iron                                          | 0.53 kg                    | (RU)             | Pig iron                                          | 0.53 kg                    | (51% RU, 49% BR) |
| Steel, unalloyed, production, 1 kg (SK) |                            |                          | Natural gas                                       | 2.53 · 10 <sup>-2</sup> \$ | (RU)             | Natural gas                                       | 1.09 · 10 <sup>-2</sup> \$ | (NO)             |
| Working hours                           | 1.61 · 10 <sup>-2</sup> h  | (SK)                     | Electricity                                       | 1.24 · 10 <sup>-2</sup> \$ | (FR)             | Electricity                                       | 1.99 · 10 <sup>-2</sup> \$ | (BE)             |
| Pig iron                                | 0.90 kg                    | (61% RU, 39% CZ)         | Chromium steel, hot rolled, production, 1 kg (CN) |                            |                  | Chromium steel, hot rolled, production, 1 kg (US) |                            |                  |
| Natural gas                             | 3.40 · 10 <sup>-4</sup> \$ | (51% NO, 49% RU)         | Working hours                                     | 8.10 · 10 <sup>-2</sup> h  | (CN)             | Working hours                                     | 1.87 · 10 <sup>-2</sup> h  | (US)             |
| Electricity                             | 2.76 · 10 <sup>-3</sup> \$ | (SK)                     | Ferchromium                                       | 0.26 kg                    | (66% ZA, 34% KZ) | Ferchromium                                       | 0.26 kg                    | (76% , 24% KZ)   |
| Synthetic rubber production, 1 kg (DE)  |                            |                          | Ferronickel                                       | 0.32 kg                    | (ID)             | Ferronickel                                       | 0.32 kg                    | (61% BR, 49% GT) |
| Working hours                           | 1.92 · 10 <sup>-2</sup> h  | (DE)                     | Pig iron                                          | 0.53 kg                    | (CN)             | Pig iron                                          | 0.53 kg                    | (RU)             |
| Carbon black                            | 0.37 kg                    | (DE)                     | Natural gas                                       | 7.15 · 10 <sup>-3</sup> \$ | (TM)             | Natural gas                                       | 2.00 · 10 <sup>-2</sup> \$ | (CA)             |
| Polyethylene                            | 0.25 kg                    | (DE)                     | Electricity                                       | 1.85 · 10 <sup>-2</sup> \$ | (CN)             | Electricity                                       | 1.70 · 10 <sup>-2</sup> \$ | (US)             |
| Polypropylene                           | 6.28 · 10 <sup>-2</sup> kg | (DE)                     |                                                   |                            |                  |                                                   |                            |                  |
| Zinc ore                                | 4.83 · 10 <sup>-2</sup> \$ | (38% SE, 34% AU, 28% BF) |                                                   |                            |                  |                                                   |                            |                  |
| Electricity                             | 0.12 \$                    | (DE)                     |                                                   |                            |                  |                                                   |                            |                  |

Fig. S5. S-LCI results of the main blocks regarding forwarder production.

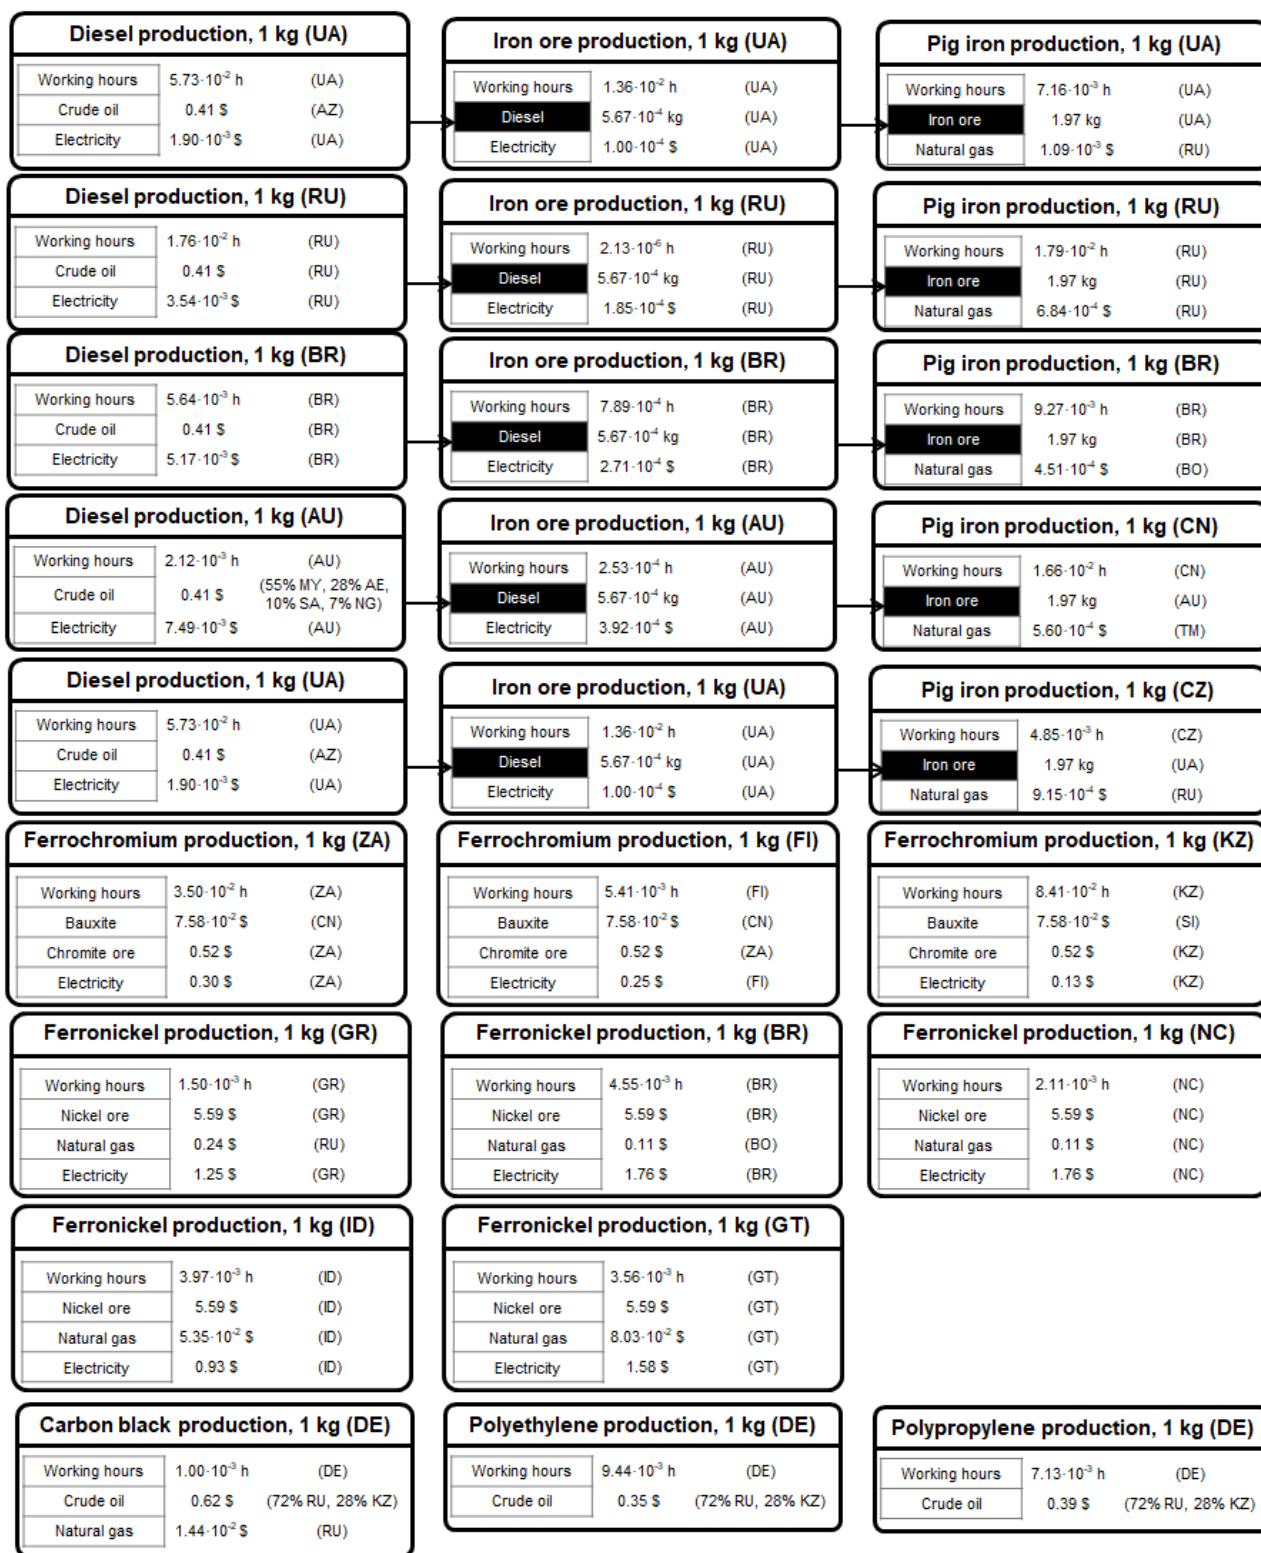

Fig. S6. S-LCI results of the background blocks regarding forwarder production.

| Diesel production, 1 kg (FR) |                                          | n-olefins production, 1 kg (FR) |                                 | Synthetic rubber production, 1 kg (FR) |                                                     |
|------------------------------|------------------------------------------|---------------------------------|---------------------------------|----------------------------------------|-----------------------------------------------------|
| Working hours                | 1.05 · 10 <sup>-2</sup> h (FR)           | Working hours                   | 7.14 · 10 <sup>-4</sup> h (FR)  | Working hours                          | 1.48 · 10 <sup>-2</sup> h (FR)                      |
| Crude oil                    | 0.41 \$ (31% RU, 29% KZ, 21% SA, 19% IR) | Ethylene                        | 0.63 kg (FR)                    | Carbon black                           | 0.37 kg (45% DE, 29% RU, 26% NL)                    |
| Electricity                  | 2.76 · 10 <sup>-3</sup> \$ (RU)          | Paraffin                        | 0.35 kg (MY, CN)                | Polyethylene                           | 0.25 kg (47% BE, 34% DE, 19% NL)                    |
|                              |                                          | Natural gas                     | 8.95 · 10 <sup>-2</sup> \$ (NO) | Polypropylene                          | 6.28 · 10 <sup>-2</sup> kg (FR)                     |
|                              |                                          | Electricity                     | 2.23 · 10 <sup>-2</sup> \$ (FR) | Zinc ore                               | 4.83 · 10 <sup>-2</sup> \$ (33% SE, 41% AU, 26% BF) |
|                              |                                          |                                 |                                 | Electricity                            | 7.47 · 10 <sup>-2</sup> \$ (FR)                     |

Fig. S7. S-LCI results of the main blocks regarding lubricating oil production.

| Ethylene production, 1 kg (FR)      |                                          | Paraffin production, 1 kg (MY)     |                                          | Paraffin production, 1 kg (CN)     |                                                  |
|-------------------------------------|------------------------------------------|------------------------------------|------------------------------------------|------------------------------------|--------------------------------------------------|
| Working hours                       | 8.67 · 10 <sup>-4</sup> h (FR)           | Working hours                      | 6.04 · 10 <sup>-3</sup> h (MY)           | Working hours                      | 2.09 · 10 <sup>-2</sup> h (CN)                   |
| Crude oil                           | 0.36 \$ (31% RU, 29% KZ, 21% SA, 19% IR) | Crude oil                          | 0.41 \$ (45% SA, 26% AE, 16% VE, 13% GA) | Crude oil                          | 0.41 \$ (26% RU, 23% SA, 22% AO, 15% IQ, 14% OM) |
|                                     |                                          | Natural gas                        | 1.67 · 10 <sup>-2</sup> \$ (ID)          | Natural gas                        | 1.30 · 10 <sup>-2</sup> \$ (TM)                  |
|                                     |                                          | Electricity                        | 1.55 · 10 <sup>-3</sup> \$ (MY)          | Electricity                        | 2.94 · 10 <sup>-3</sup> \$ (CN)                  |
|                                     |                                          |                                    |                                          |                                    |                                                  |
| Carbon black production, 1 kg (DE)  |                                          | Carbon black production, 1 kg (RU) |                                          | Carbon black production, 1 kg (NL) |                                                  |
| Working hours                       | 1.00 · 10 <sup>-3</sup> h (DE)           | Working hours                      | 2.23 · 10 <sup>-2</sup> h (RU)           | Working hours                      | 1.04 · 10 <sup>-3</sup> h (NL)                   |
| Crude oil                           | 0.62 \$ (72% RU, 28% KZ)                 | Crude oil                          | 0.62 \$ (RU)                             | Crude oil                          | 0.62 \$ (56% RU, 44% NO)                         |
| Natural gas                         | 1.44 · 10 <sup>-2</sup> \$ (RU)          | Natural gas                        | 8.62 · 10 <sup>-2</sup> \$ (RU)          | Natural gas                        | 1.27 · 10 <sup>-2</sup> \$ (NO)                  |
|                                     |                                          |                                    |                                          |                                    |                                                  |
| Polyethylene production, 1 kg (BE)  |                                          | Polyethylene production, 1 kg (DE) |                                          | Polyethylene production, 1 kg (NL) |                                                  |
| Working hours                       | 6.51 · 10 <sup>-3</sup> h (BE)           | Working hours                      | 9.44 · 10 <sup>-3</sup> h (DE)           | Working hours                      | 9.15 · 10 <sup>-3</sup> h (NL)                   |
| Crude oil                           | 0.35 \$ (61% RU, 39% NO)                 | Crude oil                          | 0.35 \$ (72% RU, 28% KZ)                 | Crude oil                          | 0.35 \$ (56% RU, 44% NO)                         |
|                                     |                                          |                                    |                                          |                                    |                                                  |
| Polypropylene production, 1 kg (FR) |                                          |                                    |                                          |                                    |                                                  |
| Working hours                       | 7.29 · 10 <sup>-3</sup> h (FR)           |                                    |                                          |                                    |                                                  |
| Crude oil                           | 0.39 \$ (31% RU, 29% KZ, 21% SA, 19% IR) |                                    |                                          |                                    |                                                  |

Fig. S8. S-LCI results of the background blocks regarding lubricating oil production.
